# Supplementary material for: APOE genotype influences on the brain metabolome of aging mice – role for mitochondrial energetics in mechanisms of resilience in APOE2 genotype
Source: Springer Nature journal article supplement (doi:10.1186/s13024-025-00888-z), 2025-09-02
Supplement: MOESM1 [file 13024_2025_888_MOESM1_ESM.pdf › 13024_2025_888_MOESM1_ESM.pdf]

**Table S1. The demographics of the ROS-MAP cohort, subset used for the analysis.**

|                                                                               | ApoE2/3         | ApoE3/3         | ApoE 3/4        |
|-------------------------------------------------------------------------------|-----------------|-----------------|-----------------|
| n=                                                                            | 66              | 304             | 112             |
| Age at death (mean $\pm$ std eva)                                             | 92.3 $\pm$ 6.6  | 90.5 $\pm$ 6.35 | 89.5 $\pm$ 5.5  |
| BMI (lastest data available)                                                  | 24.1 $\pm$ 5.08 | 26.2 $\pm$ 5.28 | 25.4 $\pm$ 4.54 |
| Education                                                                     | 15.4 $\pm$ 3.11 | 15.9 $\pm$ 3.41 | 16.3 $\pm$ 3.24 |
| PMI                                                                           | 7.51 $\pm$ 4.01 | 8.5 $\pm$ 5.36  | 7.29 $\pm$ 3.91 |
| Sex (Male %)                                                                  | 18.18 %         | 31.25 %         | 32.14 %         |
| Final consensus cognitive diagnosis                                           |                 |                 |                 |
| NCI: No cognitive impairment (No impaired domains)                            | 41%             | 32%             | 18%             |
| MCI: Mild cognitive impairment (One impaired domain) and NO other cause of CI | 17%             | 27%             | 19%             |
| MCI: Mild cognitive impairment (One impaired domain) AND another cause of CI  | 5%              | 0%              | 1%              |
| AD: Alzheimer's dementia and NO other cause of CI (NINCDS PROB AD)            | 30%             | 35%             | 52%             |
| AD: Alzheimer's dementia AND another cause of CI (NINCDS POSS AD)             | 8%              | 5%              | 8%              |
| Other dementia: Other primary cause of dementia                               | 0%              | 2%              | 3%              |
